# Supplementary material for: Role of Glutathione in Neutrophil Chemotaxis in Periodontitis
Source: MDPI journal article supplement (doi:10.3390/oral3040043), 2023-11-23
Supplement: s1 [file s1]

# Role of Glutathione in Neutrophil Chemotaxis in Periodontitis

Nurul Iman Binti Badlishah Sham <sup>1,2</sup> and Melissa M. Grant <sup>2,\*</sup>

<sup>1</sup> Faculty of Dentistry, Universiti Sains Islam Malaysia, Kuala Lumpur 55100, Malaysia; nuruliman@usim.edu.my

<sup>2</sup> School of Dentistry, Institute of Clinical Sciences, University of Birmingham, 5 Mill Pool Way, Edgbaston, Birmingham B5 7EG, UK

\* Correspondence: m.m.grant@bham.ac.uk

To demonstrate that our instrumentation and methods could detect glutathionylated protein the method of Regazzoni et al., 2009 (J Chromatogr B Anal Technol Biomed Life Sci. 877(28):3456–61) was used to first modify haemoglobin by glutathionylation and then detection of the changes by mass spectrometry. Figure S1 shows that haemoglobin (Hb) can be detected with the post translational modification with glutathionylation by mass shift. The modified Hb was also digested and prepared for LC-MS/MS to explore if the localisation of the modification could be detected. Figure S2 shows the cysteines that were identified as being glutathionylated.

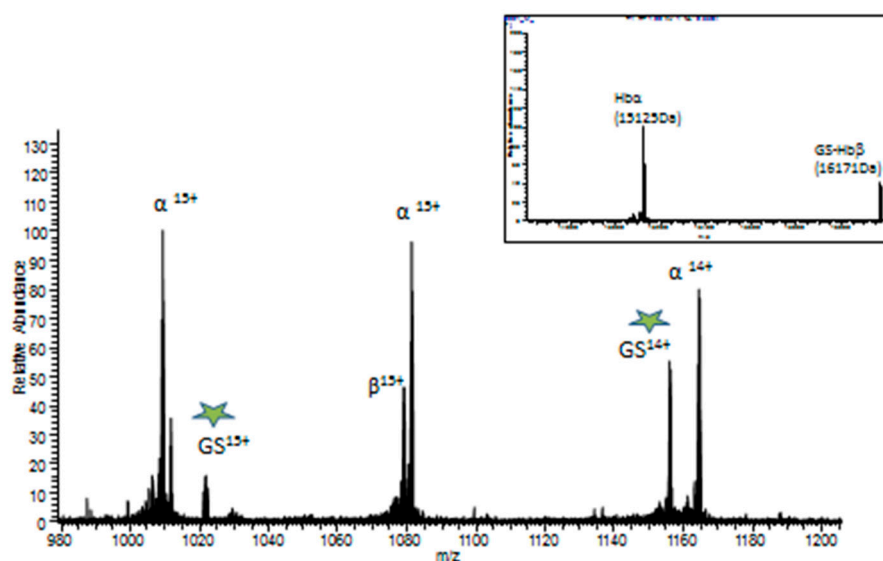

**Figure S1.** Mass spectrum of haemoglobin by direct infusion method showing alpha and glutathionylated beta peaks of masses 15125 Da and 16171 Da respectively in the top panel. The bottom panel depicts the mass spectra of hemoglobin along with the charge distribution for alpha and glutathionylated beta subunits of Hb.

MVHLTPEEKSAVTALWGKVVNDEVGGEALGRLLVVYPWTQRFFESFGDLSTPDAMGNPKV-  
KAHGKKVLGAFSDGLAHLNKLKGTFAITLSELHCDKLHVDPENFRLLGNVLVCVLAHHFGKEFTPPVQAAAYQKVVAG  
VANALAHKYH

Peptides:

GTFATLSELHcDK (4 PSMs)

VLGAFSDGLAHLNKLKGTFAITLSELHcDK (4 PSMs)

GTFATLSELHcDKLHVDPENFR (1 PSM)

LLGNVLVCVLAHHFGK (5 PSMs)

LLGnVLVCVLAHHFGK (4 PSMs)

**Figure S2.** Sequence of beta haemoglobin subunit with cysteine modified with glutathionylation highlighted in green.

**Table S1.** Accession number, description of protein and log fold change and p value for comparing the proteins isolated from neutrophils and identified by TMT based quantitative mass spectrometry from periodontitis patients and healthy controls.

| Accession | Description                                | LOG2 fold change value | Log10 p- |
|-----------|--------------------------------------------|------------------------|----------|
| P68871    | Haemoglobin subunit beta                   | -1.02                  | 1.55     |
| P28161    | Glutathione S-transferase Mu 2             | -1.00                  | 0.45     |
| P00915    | carbonic anhydrase 1                       | -0.88                  | 1.40     |
| P02042    | Haemoglobin subunit delta                  | -0.84                  | 1.74     |
| P69905    | Haemoglobin subunit alpha                  | -0.79                  | 1.49     |
| P00390    | Glutathione reductase, mitochondrial       | -0.52                  | 2.44     |
| P27695    | DNA-(apurinic or apyrimidinic site) lyase  | -0.20                  | 2.12     |
| P07339    | Cathepsin D                                | 0.11                   | 1.52     |
| Q07960    | rho GTPase-activating protein 1            | 0.13                   | 1.43     |
| P35754    | Glutaredoxin-1                             | 0.24                   | 1.42     |
| Q9P2E9-1  | Ribosome-binding protein 1                 | 0.24                   | 1.42     |
| P60953    | Cell division control protein 42 homolog   | 0.26                   | 2.93     |
| P06737-1  | Glycogen phosphorylase, liver form         | 0.26                   | 2.03     |
| P11766    | alcohol dehydrogenase class-3              | 0.30                   | 3.91     |
| P43490    | nicotinamide phosphoribosyltransferase     | 0.33                   | 1.34     |
| P40227-1  | T-complex protein 1 subunit zeta           | 0.34                   | 1.55     |
| P28838    | cytosol aminopeptidase                     | 0.41                   | 1.44     |
| Q14697-2  | Isoform 2 of Neutral alpha-glucosidase AB  | 0.42                   | 1.72     |
| P28676    | Grancalcin                                 | 0.46                   | 1.33     |
| Q01432-4  | Isoform 2 of AMP deaminase 3               | 0.50                   | 1.43     |
| O75915    | PRA1 family protein 3                      | 0.61                   | 1.55     |
| Q9UJ70-2  | Isoform 2 of N-acetyl-D-glucosamine kinase | 0.63                   | 1.69     |

|          |                                                                               |       |      |
|----------|-------------------------------------------------------------------------------|-------|------|
| P60842   | Eukaryotic initiation factor 4A-I                                             | 1.01  | 0.64 |
| P05164-3 | Isoform H7 of Myeloperoxidase                                                 | 1.06  | 0.50 |
| Q6FI13   | Histone H2A type 2-A                                                          | 1.30  | 0.38 |
| P08311   | Cathepsin G                                                                   | 1.33  | 0.45 |
| P11678   | Eosinophil peroxidase                                                         | 1.36  | 0.58 |
| P23527   | Histone H2B type 1-O                                                          | 1.45  | 0.44 |
| P62805   | histone H4                                                                    | 1.46  | 0.48 |
| P51858   | hepatoma-derived growth factor                                                | -0.75 | 0.68 |
| P02769   | Serum albumin                                                                 | -0.73 | 1.20 |
| P54819   | Adenylate kinase 2, mitochondrial                                             | -0.66 | 0.31 |
| Q3SZR3   | Alpha-1-acid glycoprotein                                                     | -0.66 | 0.69 |
| P02768-1 | Serum albumin                                                                 | -0.56 | 0.73 |
| P62140   | Serine/threonine-protein phosphatase PP1-beta catalytic subunit               | -0.56 | 0.48 |
| P20810-6 | Isoform 6 of Calpastatin                                                      | -0.56 | 0.50 |
| P32119   | Peroxiredoxin-2                                                               | -0.52 | 0.79 |
| Q28194   | Thrombospondin-1 (Fragment)                                                   | -0.52 | 0.67 |
| P16402   | Histone H1.3                                                                  | -0.50 | 0.29 |
| Q96HE7   | ERO1-like protein alpha                                                       | -0.49 | 0.28 |
| P14678-3 | Isoform SM-B1 of Small nuclear ribonucleoprotein-associated proteins B and B' | -0.47 | 0.45 |
| P54108-3 | Isoform 3 of Cysteine-rich secretory protein 3                                | -0.47 | 0.53 |
| P61981   | 14-3-3 protein gamma                                                          | -0.47 | 1.15 |
| P10412   | Histone H1.4                                                                  | -0.46 | 0.20 |
| O75015   | Low affinity immunoglobulin gamma Fc region receptor III-B                    | -0.46 | 0.31 |
| P16104   | Histone H2AX                                                                  | -0.45 | 0.81 |
| P40121   | Macrophage-capping protein                                                    | -0.43 | 0.83 |
| P42166   | Lamina-associated polypeptide 2, isoform alpha                                | -0.42 | 0.98 |
| Q96E17   | ras-related protein Rab-3C                                                    | -0.42 | 0.20 |
| P32320   | cytidine deaminase                                                            | -0.41 | 0.49 |
| P04264   | Keratin, type II cytoskeletal 1                                               | -0.39 | 0.90 |
| O75368   | SH3 domain-binding glutamic acid-rich-like protein                            | -0.39 | 0.47 |
| P31150   | Rab GDP dissociation inhibitor alpha                                          | -0.38 | 0.39 |
| P11166   | Solute carrier family 2, facilitated glucose transporter member 1             | -0.38 | 0.23 |

|          |                                                                                                                  |       |      |
|----------|------------------------------------------------------------------------------------------------------------------|-------|------|
| P02763   | Alpha-1-acid glycoprotein 1                                                                                      | -0.37 | 0.35 |
| P23526-1 | Adenosylhomocysteinase                                                                                           | -0.37 | 0.60 |
| P08637   | Low affinity immunoglobulin gamma Fc region receptor III-A                                                       | -0.37 | 0.81 |
| P07910-1 | Heterogeneous nuclear ribonucleoproteins C1/C2                                                                   | -0.37 | 0.80 |
| O00232-1 | 26s proteasome non-atpase regulatory subunit 12                                                                  | -0.36 | 0.87 |
| P50990   | T-complex protein 1 subunit theta                                                                                | -0.35 | 0.42 |
| Q9Y2Y8   | proteoglycan 3                                                                                                   | -0.35 | 0.22 |
| P36957   | Dihydrolipoyllysine-residue succinyltransferase component of 2-oxoglutarate dehydrogenase complex, mitochondrial | -0.34 | 0.18 |
| P25787   | Proteasome subunit alpha type-2                                                                                  | -0.34 | 1.02 |
| P62158   | Calmodulin                                                                                                       | -0.33 | 0.14 |
| P00488   | Coagulation factor XIII A chain                                                                                  | -0.33 | 0.18 |
| P41218   | Myeloid cell nuclear differentiation antigen                                                                     | -0.33 | 0.49 |
| P04179   | Superoxide dismutase                                                                                             | -0.33 | 0.43 |
| P05204   | Non-histone chromosomal protein HMG-17                                                                           | -0.33 | 0.11 |
| P13645   | Keratin, type I cytoskeletal 10                                                                                  | -0.33 | 0.55 |
| Q5JTV8-3 | Isoform 3 of Torsin-1A-interacting protein 1                                                                     | -0.31 | 0.51 |
| Q01518-1 | adenylyl cyclase-associated protein 1                                                                            | -0.31 | 0.20 |
| Q92688   | Acidic leucine-rich nuclear phosphoprotein 32 family member B                                                    | -0.30 | 0.45 |
| Q14739   | Lamin-B receptor                                                                                                 | -0.30 | 0.14 |
| P00918   | Carbonic anhydrase 2                                                                                             | -0.29 | 1.06 |
| P61077-3 | Isoform 3 of Ubiquitin-conjugating enzyme E2 D3                                                                  | -0.28 | 0.24 |
| Q9Y2S6   | Translation machinery-associated protein 7                                                                       | -0.28 | 0.60 |
| Q9HBI1-2 | Isoform 2 of Beta-parvin                                                                                         | -0.28 | 0.22 |
| P27348   | 14-3-3 protein theta                                                                                             | -0.28 | 0.16 |
| Q15942   | Zyxin                                                                                                            | -0.28 | 0.43 |
| P0DOX5   | immunoglobulin gamma-1 heavy chain                                                                               | -0.27 | 0.19 |
| P49721   | proteasome subunit beta type-2                                                                                   | -0.27 | 0.35 |
| P22061-2 | Isoform 2 of Protein-L-isoaspartate(D-aspartate) O-methyltransferase                                             | -0.27 | 0.53 |
| P62937   | peptidyl-prolyl cis-trans isomerase A                                                                            | -0.26 | 0.81 |

|          |                                                |       |       |
|----------|------------------------------------------------|-------|-------|
|          | Serine/threonine-protein phosphatase 2A        |       |       |
| Q15257-1 | activator                                      | -0.26 | 0.28  |
| Q9UBW5-1 | Bridging integrator 2                          | -0.26 | 0.22  |
| P10768   | S-formylglutathione hydrolase                  | -0.25 | 0.50  |
|          | Isoform 2 of Eukaryotic translation initiation |       |       |
| P63241-2 | factor 5A-1                                    | -0.25 | 0.20  |
| P09429   | High mobility group protein B1                 | -0.24 | 0.41  |
| P52907   | F-actin-capping protein subunit alpha-1        | -0.23 | 0.31  |
| Q15366-2 | Isoform 2 of Poly(rC)-binding protein 2        | -0.23 | 0.61  |
| P31146   | Coronin-1A                                     | -0.23 | 0.349 |
| Q9NQR4   | Omega-amidase NIT2                             | -0.22 | 0.16  |
| P07737   | profilin-1                                     | -0.22 | 0.21  |
| P14317   | Hematopoietic lineage cell-specific protein    | -0.22 | 0.47  |
| P61970   | nuclear transport factor 2                     | -0.22 | 0.83  |
| P16401   | Histone H1.5                                   | -0.22 | 0.16  |
|          | Isoform 2 of Adenylyl cyclase-associated       |       |       |
| Q01518-2 | protein 1                                      | -0.21 | 0.23  |
|          | 4-trimethylaminobutyraldehyde                  |       |       |
| P49189   | dehydrogenase                                  | -0.21 | 0.31  |
| P26583   | High mobility group protein B2                 | -0.20 | 0.32  |
| P06703   | protein S100-A6                                | -0.20 | 0.16  |
| Q14847-2 | Isoform 2 of LIM and SH3 domain protein 1      | -0.20 | 0.16  |
| Q16698   | 2,4-dienoyl-CoA reductase, mitochondrial       | -0.20 | 0.77  |
| P80723   | Brain acid soluble protein 1                   | -0.20 | 0.27  |
| P13798   | Acylamino-acid-releasing enzyme                | -0.20 | 0.94  |
| Q9UKM9-1 | RNA-binding protein Raly                       | -0.20 | 0.94  |
| P08758   | annexin A5                                     | -0.20 | 0.22  |
| P12429   | annexin A3                                     | -0.20 | 0.23  |
| P63313   | thymosin beta-10                               | -0.20 | 0.78  |
| Q9UL46   | proteasome activator complex subunit 2         | -0.20 | 0.26  |
| Q14103   | heterogeneous nuclear ribonucleoprotein D0     | -0.19 | 0.42  |
| P13693   | Translationally-controlled tumor protein       | -0.19 | 0.39  |
| P24557-3 | Isoform 3 of Thromboxane-A synthase            | -0.19 | 0.27  |
| P61626   | lysozyme c                                     | -0.19 | 0.18  |
| Q06830   | peroxiredoxin-1                                | -0.19 | 0.49  |
| P02775   | Platelet basic protein                         | -0.19 | 0.33  |
| P20061   | Transcobalamin-1                               | -0.19 | 0.16  |
| P04083   | annexin A1                                     | -0.18 | 0.15  |

|          |                                             |       |      |
|----------|---------------------------------------------|-------|------|
|          | Isoform 2 of BH3-interacting domain death   |       |      |
| P55957-2 | agonist                                     | -0.18 | 0.28 |
| O75367-1 | Core histone macro-H2A.1                    | -0.18 | 0.36 |
| P50502   | Hsc70-interacting protein                   | -0.18 | 0.20 |
|          | Isoform 2 of Medium-chain specific acyl-CoA |       |      |
| P11310-2 | dehydrogenase, mitochondrial                | -0.17 | 0.24 |
| Q05315   | galectin-10                                 | -0.17 | 0.13 |
| Q99497   | protein/nucleic acid deglycase DJ-1         | -0.17 | 0.64 |
| P14780   | Matrix metalloproteinase-9                  | -0.17 | 0.26 |
| Q14019   | coactosin-like protein                      | -0.16 | 0.14 |
| P30044-1 | Peroxiredoxin-5, mitochondrial              | -0.15 | 0.16 |
| P36871-1 | Phosphoglucomutase-1                        | -0.15 | 0.50 |
| P31949   | protein S100-A11                            | -0.15 | 0.10 |
| A6NI72   | Putative neutrophil cytosol factor 1B       | -0.14 | 0.27 |
| P51991-1 | Heterogeneous nuclear ribonucleoprotein A3  | -0.14 | 0.43 |
|          | Isoform 2 of Fructose-bisphosphate aldolase |       |      |
| P04075-2 | A                                           | -0.14 | 0.29 |
| P16403   | Histone H1.2                                | -0.14 | 0.14 |
| Q9NYL9   | tropomodulin-3                              | -0.13 | 0.15 |
| Q00839   | Heterogeneous nuclear ribonucleoprotein U   | -0.13 | 0.50 |
| P26038   | Moesin                                      | -0.13 | 0.33 |
| O75131   | Copine-3                                    | -0.13 | 0.30 |
|          | SH3 domain-binding glutamic acid-rich-like  |       |      |
| Q9H299   | protein 3                                   | -0.13 | 0.22 |
| P40197   | Platelet glycoprotein V                     | -0.12 | 0.14 |
| Q92522   | Histone H1x                                 | -0.12 | 0.13 |
| P61088   | ubiquitin-conjugating enzyme E2 N           | -0.12 | 0.64 |
| P02730   | Band 3 anion transport protein              | -0.12 | 0.09 |
| Q9NQC3   | Reticulon-4                                 | -0.12 | 0.18 |
| P11215-2 | Isoform 2 of Integrin alpha-M               | -0.13 | 0.16 |
| P13489   | Ribonuclease inhibitor                      | -0.12 | 0.60 |
| P00491   | purine nucleoside phosphorylase             | -0.12 | 0.16 |
| P61916   | Epididymal secretory protein E1             | -0.11 | 0.26 |
| O00764-1 | Pyridoxal kinase                            | -0.12 | 0.15 |
| P04040   | catalase                                    | -0.12 | 0.46 |
| Q15084-2 | Isoform 2 of Protein disulfide-isomerase A6 | -0.12 | 0.23 |
| P33241-3 | Isoform 3 of Lymphocyte-specific protein 1  | -0.12 | 0.13 |
| P20340-1 | Ras-related protein Rab-6A                  | -0.11 | 0.22 |
| P22234   | multifunctional protein ADE2                | -0.11 | 0.59 |

|          |                                                            |       |      |
|----------|------------------------------------------------------------|-------|------|
| P00761   | Trypsin OS=Sus scrofa PE=1 SV=1                            | -0.11 | 0.20 |
| P54725   | UV excision repair protein RAD23 homolog A                 | -0.11 | 0.06 |
| P07305   | Histone H1.0                                               | -0.10 | 0.08 |
| P80511   | Protein S100-A12                                           | -0.10 | 0.11 |
| Q1KMD3   | heterogeneous nuclear ribonucleoprotein U-like protein 2   | -0.10 | 0.19 |
| P40926   | Malate dehydrogenase, mitochondrial                        | -0.10 | 0.44 |
| Q9UQ80   | proliferation-associated protein 2G4                       | -0.10 | 0.11 |
| P30504   | HLA class I histocompatibility antigen, Cw-4 alpha chain   | -0.10 | 0.19 |
| P14314   | Glucosidase 2 subunit beta                                 | -0.10 | 0.06 |
| P61604   | 10 kDa heat shock protein, mitochondrial                   | -0.09 | 0.20 |
| P13796   | Plastin-2                                                  | -0.08 | 0.07 |
| P78417   | Glutathione S-transferase omega-1                          | -0.08 | 0.09 |
| P00558   | phosphoglycerate kinase 1                                  | -0.08 | 0.07 |
| P40925-3 | Isoform 3 of Malate dehydrogenase, cytoplasmic             | -0.08 | 0.11 |
| P51149   | ras-related protein Rab-7a                                 | -0.08 | 0.11 |
| Q92930   | Ras-related protein Rab-8B                                 | -0.08 | 0.06 |
| P19338   | Nucleolin                                                  | -0.07 | 0.07 |
| P80188   | Neutrophil gelatinase-associated lipocalin                 | -0.07 | 0.08 |
| P37837   | Transaldolase                                              | -0.07 | 0.06 |
| P10599-1 | thioredoxin                                                | -0.07 | 0.10 |
| P23528   | Cofilin-1                                                  | -0.07 | 0.07 |
| Q9UM07   | Protein-arginine deiminase type-4                          | -0.07 | 0.03 |
| Q9Y5Z4-1 | Heme-binding protein 2                                     | -0.07 | 0.37 |
| P50552   | Vasodilator-stimulated phosphoprotein                      | -0.07 | 0.15 |
| P18669   | Phosphoglycerate mutase 1                                  | -0.07 | 0.13 |
| Q6JBY9   | CapZ-interacting protein                                   | -0.07 | 0.13 |
| P52566   | Rho GDP-dissociation inhibitor 2                           | -0.06 | 0.08 |
| P09211   | Glutathione S-transferase P                                | -0.06 | 0.04 |
| P08567   | pleckstrin                                                 | -0.06 | 0.08 |
| P63104   | 14-3-3 protein zeta/delta                                  | -0.06 | 0.05 |
| P0DMV8   | heat shock 70 kDa protein 1A                               | -0.06 | 0.13 |
| Q13011   | Delta(3,5)-Delta(2,4)-dienoyl-CoA isomerase, mitochondrial | -0.06 | 0.16 |
| P09917   | arachidonate 5-lipoxygenase                                | -0.06 | 0.08 |
| P23368-1 | NAD-dependent malic enzyme, mitochondrial                  | -0.06 | 0.18 |

|          |                                                              |       |      |
|----------|--------------------------------------------------------------|-------|------|
| P25815   | Protein S100-P                                               | -0.05 | 0.04 |
| P05107   | Integrin beta-2                                              | -0.05 | 0.11 |
| P02788   | Lactotransferrin                                             | -0.05 | 0.05 |
| Q969H8   | Myeloid-derived growth factor                                | -0.05 | 0.12 |
| P31946   | 14-3-3 protein beta/alpha                                    | -0.05 | 0.07 |
| P26641-2 | Isoform 2 of Elongation factor 1-gamma                       | -0.05 | 0.11 |
| Q9BRA2   | Thioredoxin domain-containing protein 17                     | -0.05 | 0.05 |
| Q15907   | Ras-related protein Rab-11B                                  | -0.05 | 0.14 |
| P62258-1 | 14-3-3 protein epsilon                                       | -0.05 | 0.26 |
| Q00325-1 | Phosphate carrier protein, mitochondrial                     | -0.04 | 0.07 |
| Q96FJ2   | Dynein light chain 2, cytoplasmic                            | -0.04 | 0.06 |
| Q9NZN3   | EH domain-containing protein 3                               | -0.04 | 0.03 |
| Q3ZBD7   | Glucose-6-phosphate isomerase OS=Bos taurus GN=GPI PE=2 SV=4 | -0.04 | 0.04 |
| Q12905   | Interleukin enhancer-binding factor 2                        | -0.04 | 0.13 |
| P05455   | Lupus La protein                                             | -0.04 | 0.05 |
| P55008-1 | Allograft inflammatory factor 1                              | -0.04 | 0.13 |
| P26599-3 | Isoform 3 of Polypyrimidine tract-binding protein 1          | -0.04 | 0.11 |
| Q6P4A8   | Phospholipase B-like 1                                       | -0.04 | 0.04 |
| P22894   | Neutrophil collagenase                                       | -0.04 | 0.03 |
| Q9BRF8-1 | Serine/threonine-protein phosphatase CPPED1                  | -0.03 | 0.10 |
| P58546   | Myotrophin                                                   | -0.03 | 0.03 |
| P07741-1 | Adenine phosphoribosyltransferase                            | -0.03 | 0.17 |
| P37802-2 | Isoform 2 of Transgelin-2                                    | -0.03 | 0.04 |
| P60900   | Proteasome subunit alpha type-6                              | -0.03 | 0.06 |
| P06744   | glucose-6-phosphate isomerase                                | -0.03 | 0.03 |
| Q9HC38   | Glyoxalase domain-containing protein 4                       | -0.03 | 0.02 |
| P00738   | Haptoglobin                                                  | -0.03 | 0.05 |
| P00387-3 | Isoform 3 of NADH-cytochrome b5 reductase 3                  | -0.03 | 0.30 |
| P04839   | Cytochrome b-245 heavy chain                                 | -0.02 | 0.07 |
| Q99439   | Calponin-2                                                   | -0.02 | 0.03 |
| P19878   | Neutrophil cytosol factor 2                                  | -0.02 | 0.06 |
| P30048   | Thioredoxin-dependent peroxide reductase, mitochondrial      | -0.02 | 0.03 |
| P05109   | Protein S100-A8                                              | -0.02 | 0.02 |
| P30046   | D-dopachrome decarboxylase                                   | -0.02 | 0.04 |

|          |                                                                  |       |      |
|----------|------------------------------------------------------------------|-------|------|
| Q16881-1 | Thioredoxin reductase 1, cytoplasmic                             | -0.02 | 0.04 |
| P08133-1 | annexin A6                                                       | -0.02 | 0.02 |
| P14866   | Heterogeneous nuclear ribonucleoprotein L                        | -0.02 | 0.08 |
| Q10588   | ADP-ribosyl cyclase/cyclic ADP-ribose hydrolase 2                | -0.02 | 0.04 |
| P45880-1 | Isoform 1 of Voltage-dependent anion-selective channel protein 2 | -0.02 | 0.07 |
| P46459   | Vesicle-fusing ATPase                                            | -0.01 | 0.02 |
| Q92882   | osteoclast-stimulating factor 1                                  | -0.01 | 0.03 |
| P68036-3 | Isoform 3 of Ubiquitin-conjugating enzyme E2 L3                  | -0.01 | 0.01 |
| P26447   | Protein S100-A4                                                  | -0.01 | 0.01 |
| P22626   | heterogeneous nuclear ribonucleoproteins A2/B1                   | -0.01 | 0.01 |
| P50395-1 | Rab GDP dissociation inhibitor beta                              | -0.01 | 0.04 |
| P47756-2 | Isoform 2 of F-actin-capping protein subunit beta                | -0.01 | 0.02 |
| P11142-1 | Heat shock cognate 71 kDa protein                                | -0.01 | 0.03 |
| P30043   | flavin reductase (NADPH)                                         | -0.01 | 0.02 |
| P11413-2 | Isoform Long of Glucose-6-phosphate 1-dehydrogenase              | -0.01 | 0.01 |
| P07996   | thrombospondin-1                                                 | -0.01 | 0.01 |
| P29350-4 | Isoform 4 of Tyrosine-protein phosphatase non-receptor type 6    | -0.01 | 0.01 |
| P15144   | aminopeptidase N                                                 | -0.00 | 0.00 |
| P09525   | annexin A4                                                       | -0.00 | 0.00 |
| P09960-1 | leukotriene A-4 hydrolase                                        | -0.00 | 0.00 |
| P07359   | Platelet glycoprotein Ib alpha chain                             | 0.00  | 0.00 |
| O43707   | Alpha-actinin-4                                                  | 0.00  | 0.00 |
| P02776   | Platelet factor 4                                                | 0.00  | 0.00 |
| P54727   | UV excision repair protein RAD23 homolog B                       | 0.00  | 0.01 |
| Q6UX06   | Olfactomedin-4                                                   | 0.00  | 0.00 |
| P05106   | Integrin beta-3                                                  | 0.01  | 0.01 |
| P53004   | Biliverdin reductase A                                           | 0.01  | 0.03 |
| P62328   | Thymosin beta-4                                                  | 0.01  | 0.02 |
| P15311   | Ezrin                                                            | 0.01  | 0.04 |
| P06702   | Protein S100-A9                                                  | 0.02  | 0.02 |
| O75594   | peptidoglycan recognition protein 1                              | 0.02  | 0.02 |
| P61224-1 | Ras-related protein Rap-1b                                       | 0.02  | 0.03 |

|          |                                                                               |      |      |
|----------|-------------------------------------------------------------------------------|------|------|
| P31948-2 | Isoform 2 of Stress-induced-phosphoprotein 1                                  | 0.02 | 0.04 |
| P52209-2 | Isoform 2 of 6-phosphogluconate dehydrogenase, decarboxylating                | 0.02 | 0.03 |
| P61978-2 | Isoform 2 of Heterogeneous nuclear ribonucleoprotein K                        | 0.02 | 0.03 |
| Q9Y376   | Calcium-binding protein 39                                                    | 0.02 | 0.02 |
| P49748-3 | Isoform 3 of Very long-chain specific acyl-CoA dehydrogenase, mitochondrial   | 0.02 | 0.04 |
| Q9ULZ3   | apoptosis-associated speck-like protein containing a CARD                     | 0.03 | 0.02 |
| P23284   | peptidyl-prolyl cis-trans isomerase B                                         | 0.03 | 0.04 |
| P30405   | Peptidyl-prolyl cis-trans isomerase F, mitochondrial                          | 0.03 | 0.09 |
| P12814-1 | Alpha-actinin-1                                                               | 0.03 | 0.07 |
| P15954   | Cytochrome c oxidase subunit 7C, mitochondrial                                | 0.03 | 0.02 |
| P22307-1 | Non-specific lipid-transfer protein                                           | 0.03 | 0.26 |
| P04080   | Cystatin-B                                                                    | 0.03 | 0.02 |
| P29401-2 | Isoform 2 of Transketolase                                                    | 0.03 | 0.02 |
| P60174   | Triosephosphate isomerase                                                     | 0.04 | 0.05 |
| P24158   | Myeloblastin                                                                  | 0.04 | 0.04 |
| P06733-1 | alpha-enolase                                                                 | 0.04 | 0.04 |
| P17213   | Bactericidal permeability-increasing protein                                  | 0.04 | 0.03 |
| P61204   | ADP-ribosylation factor 3                                                     | 0.04 | 0.03 |
| P50995   | annexin A11                                                                   | 0.04 | 0.23 |
| P30040-1 | Endoplasmic reticulum resident protein 29                                     | 0.04 | 0.25 |
| P14550   | alcohol dehydrogenase                                                         | 0.04 | 0.30 |
| P62136-2 | Isoform 2 of Serine/threonine-protein phosphatase PP1-alpha catalytic subunit | 0.04 | 0.33 |
| Q12906-7 | Isoform 7 of Interleukin enhancer-binding factor 3                            | 0.05 | 0.19 |
| P02647   | Apolipoprotein A-I                                                            | 0.05 | 0.15 |
| P16949-2 | Isoform 2 of Stathmin                                                         | 0.05 | 0.05 |
| Q13177   | Serine/threonine-protein kinase PAK 2                                         | 0.05 | 0.18 |
| P38646   | Stress-70 protein, mitochondrial                                              | 0.05 | 0.05 |
| O75390   | citrate synthase, mitochondrial                                               | 0.05 | 0.77 |
| P22314   | Ubiquitin-like modifier-activating enzyme 1                                   | 0.05 | 0.13 |
| O95336   | 6-phosphogluconolactonase                                                     | 0.05 | 0.08 |

|          |                                                |      |      |
|----------|------------------------------------------------|------|------|
|          | Synaptic vesicle membrane protein VAT-1        |      |      |
| Q99536   | homolog                                        | 0.06 | 0.12 |
| P11021   | 78 kDa glucose-regulated protein               | 0.06 | 0.39 |
| O15143   | Actin-related protein 2/3 complex subunit 1B   | 0.06 | 0.11 |
| O75340   | programmed cell death protein 6                | 0.06 | 0.07 |
| Q9P1F3   | Costars family protein ABRACL                  | 0.06 | 0.05 |
| Q15833-1 | Syntaxin-binding protein 2                     | 0.06 | 0.12 |
| P02675   | Fibrinogen beta chain                          | 0.06 | 0.06 |
| O00194   | ras-related protein rab-27b                    | 0.06 | 0.03 |
| P30086   | phosphatidylethanolamine-binding protein 1     | 0.06 | 0.31 |
| Q96QK1   | Vacuolar protein sorting-associated protein 35 | 0.07 | 0.12 |
| P46976-1 | Glycogenin-1                                   | 0.07 | 0.15 |
| O75083   | WD repeat-containing protein 1                 | 0.07 | 0.08 |
| P10720   | Platelet factor 4 variant                      | 0.07 | 0.06 |
| P07108-5 | Isoform 5 of Acyl-CoA-binding protein          | 0.07 | 0.07 |
| P19367-3 | Isoform 3 of Hexokinase-1                      | 0.07 | 0.12 |
| Q9Y490   | Talin-1                                        | 0.07 | 0.13 |
| Q9H4A4   | aminopeptidase B                               | 0.07 | 0.08 |
|          | Mesencephalic astrocyte-derived                |      |      |
| P55145   | neurotrophic factor                            | 0.08 | 0.06 |
|          | Hypoxanthine-guanine                           |      |      |
| P00492   | phosphoribosyltransferase                      | 0.08 | 0.61 |
| P32942   | Intercellular adhesion molecule 3              | 0.08 | 0.64 |
|          | Isoform 2 of Nicotinate                        |      |      |
| Q6XQN6-2 | phosphoribosyltransferase                      | 0.08 | 0.72 |
| P06865   | Beta-hexosaminidase subunit alpha              | 0.08 | 0.23 |
| P67936   | Tropomyosin alpha-4 chain                      | 0.08 | 0.08 |
| P48595   | serpin B10                                     | 0.08 | 0.20 |
|          | cAMP-dependent protein kinase type I-alpha     |      |      |
| P10644   | regulatory subunit                             | 0.08 | 0.07 |
| P11234-2 | Isoform 2 of Ras-related protein Ral-B         | 0.08 | 0.06 |
| P12956   | X-ray repair cross-complementing protein 6     | 0.08 | 0.11 |
| P36222   | Chitinase-3-like protein 1                     | 0.08 | 0.10 |
| P20073-1 | Annexin A7                                     | 0.08 | 0.18 |
| P49591   | Serine--tRNA ligase, cytoplasmic               | 0.09 | 0.09 |
|          | Adipocyte plasma membrane-associated           |      |      |
| Q9HDC9   | protein                                        | 0.09 | 0.33 |
| P68104   | Elongation factor 1-alpha 1                    | 0.09 | 0.17 |

|          |                                             |      |      |
|----------|---------------------------------------------|------|------|
|          | Receptor-type tyrosine-protein phosphatase  |      |      |
| Q12913-1 | eta                                         | 0.09 | 0.11 |
| Q04760-1 | lactoylglutathione lyase                    | 0.09 | 0.29 |
| P61158   | actin-related protein 3                     | 0.09 | 0.11 |
| O15511-1 | Actin-related protein 2/3 complex subunit 5 | 0.09 | 0.57 |
| P31943   | Heterogeneous nuclear ribonucleoprotein H   | 0.09 | 0.10 |
| Q13561-2 | Isoform 2 of Dynactin subunit 2             | 0.09 | 0.15 |
| P55786   | puromycin-sensitive aminopeptidase          | 0.10 | 0.18 |
| P04406   | glyceraldehyde-3-phosphate dehydrogenase    | 0.10 | 0.08 |
| Q06323   | Proteasome activator complex subunit 1      | 0.10 | 0.13 |
|          | Acidic leucine-rich nuclear phosphoprotein  |      |      |
| P39687   | 32 family member A                          | 0.10 | 0.15 |
| P30041   | Peroxiredoxin-6                             | 0.10 | 0.12 |
| Q9NVA2-2 | Isoform 2 of Septin-11                      | 0.10 | 0.26 |
| P13639   | Elongation factor 2                         | 0.10 | 0.12 |
| O60234   | glia maturation factor gamma                | 0.10 | 0.12 |
| Q9ULV4-3 | Isoform 3 of Coronin-1C                     | 0.10 | 0.22 |
| P08514-1 | integrin alpha-IIb                          | 0.10 | 0.18 |
| P18206   | Vinculin                                    | 0.10 | 0.27 |
| P21333   | Filamin-A                                   | 0.11 | 0.19 |
| Q96RU3-1 | Formin-binding protein 1                    | 0.11 | 0.23 |
|          | UTP--glucose-1-phosphate                    |      |      |
| Q16851   | uridylyltransferase                         | 0.11 | 0.63 |
| P30520   | adenylosuccinate synthetase isozyme 2       | 0.11 | 0.30 |
| P61106   | Ras-related protein Rab-14                  | 0.11 | 1.14 |
| Q6IBS0   | Twinfilin-2                                 | 0.11 | 0.25 |
| P99999   | cytochrome c                                | 0.11 | 0.11 |
|          | Microtubule-associated protein RP/EB family |      |      |
| Q15691   | member 1                                    | 0.12 | 0.13 |
| O15144   | Actin-related protein 2/3 complex subunit 2 | 0.12 | 0.10 |
| P10809   | 60 kDa heat shock protein, mitochondrial    | 0.12 | 0.25 |
| Q96G03   | Phosphoglucomutase-2                        | 0.12 | 0.24 |
| O00151   | PDZ and LIM domain protein 1                | 0.12 | 0.06 |
| P15153   | Ras-related C3 botulinum toxin substrate 2  | 0.12 | 0.37 |
| Q9H0U4   | ras-related protein Rab-1B                  | 0.12 | 0.16 |
| P48643   | T-complex protein 1 subunit epsilon         | 0.12 | 0.19 |
| Q14974   | Importin subunit beta-1                     | 0.12 | 0.28 |
|          | guanine nucleotide-binding protein G(i)     |      |      |
| P04899-1 | subunit alpha-2                             | 0.13 | 0.19 |

|          |                                                                      |      |      |
|----------|----------------------------------------------------------------------|------|------|
| P61586   | Transforming protein RhoA                                            | 0.12 | 0.43 |
| P16050   | arachidonate 15-lipoxygenase                                         | 0.12 | 0.22 |
| Q92820   | Gamma-glutamyl hydrolase                                             | 0.12 | 0.24 |
| P06753-2 | Isoform 2 of Tropomyosin alpha-3 chain                               | 0.13 | 0.19 |
| P13224-2 | Isoform 2 of Platelet glycoprotein Ib beta chain                     | 0.13 | 0.15 |
| Q5JWF2-1 | Guanine nucleotide-binding protein G(S) subunit alpha isoforms XLas  | 0.13 | 0.14 |
| P52565   | rho GDP-dissociation inhibitor 1                                     | 0.13 | 1.09 |
| P61020   | Ras-related protein Rab-5B                                           | 0.13 | 0.78 |
| P55072   | Transitional endoplasmic reticulum ATPase                            | 0.14 | 0.42 |
| P27105   | erythrocyte band 7 integral membrane protein                         | 0.14 | 0.23 |
| P05089-2 | Isoform 2 of Arginase-1                                              | 0.14 | 0.18 |
| P59998-3 | Isoform 3 of Actin-related protein 2/3 complex subunit 4             | 0.15 | 0.27 |
| Q96C19   | EF-hand domain-containing protein D2                                 | 0.15 | 0.50 |
| O00299   | chloride intracellular channel protein 1                             | 0.15 | 0.31 |
| P39019   | 40S ribosomal protein S19                                            | 0.15 | 0.13 |
| Q7L1Q6-3 | Isoform 3 of Basic leucine zipper and W2 domain-containing protein 1 | 0.15 | 0.42 |
| P48147   | prolyl endopeptidase                                                 | 0.15 | 0.39 |
| Q96QH2-2 | Isoform 2 of PML-RARA-regulated adapter molecule 1                   | 0.15 | 0.25 |
| P00505   | Aspartate aminotransferase, mitochondrial                            | 0.16 | 0.31 |
| Q99729-1 | Heterogeneous nuclear ribonucleoprotein A/B                          | 0.16 | 0.20 |
| P04632   | Calpain small subunit 1                                              | 0.16 | 0.62 |
| P13716-2 | Isoform 2 of Delta-aminolevulinic acid dehydratase                   | 0.16 | 0.25 |
| Q15365   | Poly(RC)-binding protein 1                                           | 0.16 | 0.34 |
| Q13813-2 | Isoform 2 of Spectrin alpha chain, non-erythrocytic 1                | 0.17 | 0.19 |
| P62826   | GTP-binding nuclear protein RAN                                      | 0.17 | 0.46 |
| O14773   | Tripeptidyl-peptidase 1                                              | 0.17 | 0.60 |
| P02671-1 | Fibrinogen alpha chain                                               | 0.17 | 0.15 |
| P22392-2 | Isoform 3 of Nucleoside diphosphate kinase B                         | 0.17 | 0.49 |
| P07237   | Protein disulfide-isomerase                                          | 0.18 | 0.23 |
| P15586   | N-acetylglucosamine-6-sulfatase                                      | 0.18 | 0.29 |
| O43488   | aflatoxin B1 aldehyde reductase member 2                             | 0.18 | 0.38 |

|           |                                               |      |      |
|-----------|-----------------------------------------------|------|------|
|           | Isoform 2 of Programmed cell death 6-         |      |      |
| Q8WUM4-2  | interacting protein                           | 0.18 | 0.51 |
| P27797    | Calreticulin                                  | 0.18 | 0.32 |
| P51159-1  | Ras-related protein Rab-27A                   | 0.18 | 0.61 |
| P07602-3  | Isoform Sap-mu-9 of Prosaposin                | 0.18 | 0.36 |
| P29692-2  | Isoform 2 of Elongation factor 1-delta        | 0.19 | 0.99 |
| P09972    | Fructose-bisphosphate aldolase C              | 0.19 | 0.33 |
|           | Guanine nucleotide-binding protein            |      |      |
| P62873    | G(I)/G(S)/G(T) subunit beta-1                 | 0.19 | 0.13 |
| P37840-1  | Alpha-synuclein                               | 0.19 | 0.11 |
| P04908    | histone H2A type 1-B/E                        | 0.19 | 0.07 |
|           | voltage-dependent anion-selective channel     |      |      |
| P21796    | protein 1                                     | 0.19 | 0.46 |
| P61160-2  | Isoform 2 of Actin-related protein 2          | 0.19 | 0.59 |
| P46940    | Ras GTPase-activating-like protein IQGAP1     | 0.20 | 1.03 |
| Q15080-1  | Neutrophil cytosol factor 4                   | 0.20 | 0.60 |
|           | Isoform Long of Proteasome subunit alpha      |      |      |
| P25786-2  | type-1                                        | 0.20 | 0.39 |
| Q15404-1  | Ras suppressor protein 1                      | 0.20 | 0.23 |
| O75923-13 | Isoform 13 of Dysferlin                       | 0.20 | 0.22 |
|           | Receptor-type tyrosine-protein phosphatase    |      |      |
| P08575-1  | C                                             | 0.20 | 0.51 |
| Q13201    | Multimerin-1                                  | 0.20 | 0.24 |
| Q9UHD8-1  | Septin-9                                      | 0.21 | 0.93 |
| P61026    | ras-related protein rab-10                    | 0.21 | 0.27 |
| Q8IX19    | Mast cell-expressed membrane protein 1        | 0.21 | 0.32 |
| P16671    | Platelet glycoprotein 4                       | 0.21 | 0.58 |
| Q13185    | chromobox protein homolog 3                   | 0.21 | 0.46 |
| O14950    | Myosin regulatory light chain 12B             | 0.21 | 0.17 |
| P30740    | Leukocyte elastase inhibitor                  | 0.21 | 0.54 |
| P07195    | L-lactate dehydrogenase B chain               | 0.22 | 0.18 |
| P31939    | bifunctional purine biosynthesis protein purH | 0.22 | 0.50 |
| Q9NUQ9    | protein FAM49B                                | 0.22 | 0.77 |
|           | Na(+)/H(+) exchange regulatory cofactor       |      |      |
| O14745    | NHE-RF1                                       | 0.22 | 0.14 |
| P16152    | Carbonyl reductase                            | 0.22 | 0.17 |
|           | Isoform 3 of LIM and senescent cell antigen-  |      |      |
| P48059-3  | like-containing domain protein 1              | 0.22 | 0.28 |
| O95810    | caveolae-associated protein 2                 | 0.22 | 0.15 |

|          |                                              |      |      |
|----------|----------------------------------------------|------|------|
| Q14005-1 | Pro-interleukin-16                           | 0.23 | 0.33 |
| P07355-2 | Isoform 2 of Annexin A2                      | 0.23 | 0.39 |
| O75475-1 | PC4 and SFRS1-interacting protein            | 0.24 | 0.29 |
| P08238   | Heat shock protein HSP 90-beta               | 0.24 | 0.49 |
| P50570-1 | Dynamin-2                                    | 0.24 | 0.45 |
|          | Probable ATP-dependent RNA helicase          |      |      |
| Q92841   | DDX17                                        | 0.24 | 0.37 |
| P53396-1 | ATP-citrate synthase                         | 0.25 | 0.25 |
| P12724   | eosinophil cationic protein                  | 0.25 | 0.12 |
|          | Isoform 3 of Malignant T-cell-amplified      |      |      |
| Q9ULC4-3 | sequence 1                                   | 0.25 | 0.71 |
| P00338-3 | Isoform 3 of L-lactate dehydrogenase A chain | 0.25 | 0.17 |
| P15121   | aldose reductase                             | 0.25 | 0.35 |
| P19971-2 | Isoform 2 of Thymidine phosphorylase         | 0.25 | 0.68 |
| P30101   | Protein disulfide-isomerase A3               | 0.25 | 0.35 |
| P51148-2 | Isoform 2 of Ras-related protein Rab-5C      | 0.26 | 0.35 |
| P48735   | Isocitrate dehydrogenase                     | 0.26 | 0.55 |
| Q9UII2-1 | ATPase inhibitor, mitochondrial              | 0.26 | 0.75 |
|          | Activated RNA polymerase II transcriptional  |      |      |
| P53999   | coactivator p15                              | 0.26 | 0.33 |
| P18054   | Arachidonate 12-lipoxygenase, 12S-type       | 0.27 | 0.42 |
| O75874   | Isocitrate dehydrogenase                     | 0.27 | 0.25 |
| P09874   | Poly                                         | 0.27 | 0.25 |
| P02679   | Fibrinogen gamma chain                       | 0.28 | 0.22 |
| P07900-2 | Isoform 2 of Heat shock protein HSP 90-alpha | 0.29 | 0.71 |
| P14625   | Endoplasmin                                  | 0.29 | 0.67 |
| O15145   | Actin-related protein 2/3 complex subunit 3  | 0.29 | 0.53 |
|          | Isoform 2 of Spliceosome RNA helicase        |      |      |
| Q13838-2 | DDX39B                                       | 0.29 | 0.27 |
| P17931   | Galectin-3                                   | 0.29 | 1.15 |
| Q86UX7   | Fermitin family homolog 3                    | 0.29 | 0.63 |
| Q3ZCW2   | Galectin-related protein                     | 0.30 | 0.28 |
| P06396   | Gelsolin                                     | 0.30 | 0.86 |
|          | Solute carrier family 2, facilitated glucose |      |      |
| P11169   | transporter member 3                         | 0.30 | 0.35 |
| P06748   | Nucleophosmin                                | 0.32 | 0.33 |
| P10153   | Non-secretory ribonuclease                   | 0.32 | 0.18 |
| Q8IUE6   | Histone H2A type 2-B                         | 0.32 | 0.20 |

|          |                                               |      |      |
|----------|-----------------------------------------------|------|------|
|          | Glutamate dehydrogenase 1, mitochondrial      |      |      |
| P00366   | OS=Bos taurus GN=GLUD1 PE=1 SV=2              | 0.33 | 0.41 |
| P27824-2 | Isoform 2 of Calnexin                         | 0.33 | 0.72 |
| O43447   | peptidyl-prolyl cis-trans isomerase H         | 0.34 | 0.44 |
| P30085   | UMP-CMP kinase                                | 0.35 | 1.01 |
| O75695   | Protein XRP2                                  | 0.35 | 0.81 |
| P84243   | histone H3.3                                  | 0.36 | 0.17 |
| P14770   | Platelet glycoprotein IX                      | 0.36 | 0.21 |
| Q05655-2 | Isoform 2 of Protein kinase C delta type      | 0.37 | 0.79 |
| P28482   | mitogen-activated protein kinase 1            | 0.37 | 0.63 |
| P59665   | Neutrophil defensin 1                         | 0.37 | 0.35 |
| P62979   | Ubiquitin-40S ribosomal protein S27a          | 0.37 | 0.60 |
| Q9H4M9   | EH domain-containing protein 1                | 0.38 | 0.37 |
| O60506   | Heterogeneous nuclear ribonucleoprotein Q     | 0.38 | 0.33 |
|          | Neuroblast differentiation-associated protein |      |      |
| Q09666-1 | AHNAK                                         | 0.38 | 0.31 |
| P14618   | Pyruvate kinase PKM                           | 0.39 | 0.78 |
| P06576   | ATP synthase subunit beta, mitochondrial      | 0.40 | 0.89 |
| P28070   | Proteasome subunit beta type-4                | 0.40 | 0.90 |
| Q9NR31   | GTP-binding protein SAR1a                     | 0.40 | 1.10 |
| P53634-1 | Dipeptidyl peptidase 1                        | 0.40 | 0.20 |
| P02656   | Apolipoprotein C-III                          | 0.41 | 0.18 |
| P24534   | Elongation factor 1-beta                      | 0.41 | 0.51 |
| P60709   | Actin, cytoplasmic 1                          | 0.41 | 0.66 |
| P20160   | Azurocidin                                    | 0.43 | 0.39 |
| O00160   | Unconventional myosin-If                      | 0.45 | 0.40 |
| P52790   | Hexokinase-3                                  | 0.46 | 0.68 |
| P52272   | Heterogeneous nuclear ribonucleoprotein M     | 0.48 | 0.32 |
|          | Platelet-activating factor acetylhydrolase IB |      |      |
| Q15102   | subunit gamma                                 | 0.49 | 0.64 |
| P09651-1 | Heterogeneous nuclear ribonucleoprotein A1    | 0.49 | 0.94 |
| P68366   | Tubulin alpha-4A chain                        | 0.51 | 0.39 |
| P09382   | Galectin-1                                    | 0.52 | 0.66 |
| P20700   | Lamin-B1                                      | 0.52 | 0.43 |
| P50225   | Sulfotransferase 1A1                          | 0.53 | 0.52 |
| P0C0S5   | Histone H2A.Z                                 | 0.53 | 0.37 |
| P68032   | Actin, alpha cardiac muscle 1                 | 0.54 | 0.70 |
| P49913   | cathelicidin antimicrobial peptide            | 0.55 | 0.75 |
| Q5QNW6-2 | Isoform 2 of Histone H2B type 2-F             | 0.56 | 0.16 |

|          |                                            |      |      |
|----------|--------------------------------------------|------|------|
| P43405-1 | Tyrosine-protein kinase SYK                | 0.57 | 0.77 |
| P68371   | Tubulin beta-4B chain                      | 0.58 | 0.56 |
| P60660   | Myosin light polypeptide 6                 | 0.62 | 0.38 |
| P08246   | Neutrophil elastase                        | 0.63 | 0.38 |
| P68363   | Tubulin alpha-1B chain                     | 0.64 | 0.54 |
| P13010   | X-ray repair cross-complementing protein 5 | 0.69 | 1.00 |
| P25705-1 | ATP synthase subunit alpha, mitochondrial  | 0.69 | 0.69 |
| P35579-1 | Myosin-9                                   | 0.70 | 0.37 |
| Q01469   | Fatty acid-binding protein, epidermal      | 0.75 | 1.06 |
| Q13418   | Integrin-linked protein kinase             | 0.77 | 0.62 |
| P07437   | tubulin beta chain                         | 0.82 | 0.44 |
| Q9H4B7   | tubulin beta-1 chain                       | 0.82 | 1.20 |
| P18124   | 60S ribosomal protein L7                   | 0.87 | 0.50 |
| P08670   | Vimentin                                   | 0.90 | 0.39 |
| P68431   | Histone H3.1                               | 0.93 | 0.34 |
